RESEARCH ARTICLE

# Functional and Structural Analysis of a $\beta$ -Glucosidase Involved in $\beta$ -1,2-Glucan Metabolism in *Listeria innocua*

Masahiro Nakajima<sup>1</sup>\*, Ryuta Yoshida<sup>1</sup>, Akimasa Miyanaga<sup>2</sup>, Koichi Abe<sup>1</sup>, Yuta Takahashi<sup>3</sup>, Naohisa Sugimoto<sup>3</sup>, Hiroyuki Toyozumi<sup>1</sup>, Hiroyuki Nakai<sup>3</sup>, Motomitsu Kitaoka<sup>4</sup>, Hayao Taguchi<sup>1</sup>

**1** Department of Applied Biological Science, Faculty of Science and Technology, Tokyo University of Science, Noda, Chiba, Japan, **2** Department of Chemistry, Tokyo Institute of Technology, Meguro-ku, Tokyo, Japan, **3** Graduate School of Science & Technology, Niigata University, Nishi-ku, Niigata, Japan, **4** National Food Research Institute, National Agriculture and Food Research Organization, Tsukuba, Ibaraki, Japan

\* These authors contributed equally to this work.

\* [m-nakajima@rs.tus.ac.jp](mailto:m-nakajima@rs.tus.ac.jp)

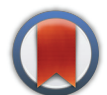

CrossMark  
click for updates

## OPEN ACCESS

**Citation:** Nakajima M, Yoshida R, Miyanaga A, Abe K, Takahashi Y, Sugimoto N, et al. (2016) Functional and Structural Analysis of a  $\beta$ -Glucosidase Involved in  $\beta$ -1,2-Glucan Metabolism in *Listeria innocua*. PLoS ONE 11(2): e0148870. doi:10.1371/journal.pone.0148870

**Editor:** Israel Silman, Weizmann Institute of Science, ISRAEL

**Received:** December 6, 2015

**Accepted:** January 25, 2016

**Published:** February 17, 2016

**Copyright:** © 2016 Nakajima et al. This is an open access article distributed under the terms of the [Creative Commons Attribution License](https://creativecommons.org/licenses/by/4.0/), which permits unrestricted use, distribution, and reproduction in any medium, provided the original author and source are credited.

**Data Availability Statement:** All coordinate files are available from RCSB Protein Data Bank (PDB IDs 4ZO6, 4ZO7, 4ZO8, 4ZO9, 4ZOA, 4ZOB, 4ZOC, 4ZOD, and 4ZOE).

**Funding:** The authors have no support or funding to report.

**Competing Interests:** The authors have declared that no competing interests exist.

## Abstract

Despite the presence of  $\beta$ -1,2-glucan in nature, few  $\beta$ -1,2-glucan degrading enzymes have been reported to date. Recently, the Lin1839 protein from *Listeria innocua* was identified as a 1,2- $\beta$ -oligoglucan phosphorylase. Since the adjacent *lin1840* gene in the gene cluster encodes a putative glycoside hydrolase family 3  $\beta$ -glucosidase, we hypothesized that Lin1840 is also involved in  $\beta$ -1,2-glucan dissimilation. Here we report the functional and structural analysis of Lin1840. A recombinant Lin1840 protein (Lin1840r) showed the highest hydrolytic activity toward sophorose (Glc- $\beta$ -1,2-Glc) among  $\beta$ -1,2-glucooligosaccharides, suggesting that Lin1840 is a  $\beta$ -glucosidase involved in sophorose degradation. The enzyme also rapidly hydrolyzed laminaribiose ( $\beta$ -1,3), but not cellobiose ( $\beta$ -1,4) or gentiobiose ( $\beta$ -1,6) among  $\beta$ -linked gluco-disaccharides. We determined the crystal structures of Lin1840r in complexes with sophorose and laminaribiose as productive binding forms. In these structures, Arg572 forms many hydrogen bonds with sophorose and laminaribiose at subsite +1, which seems to be a key factor for substrate selectivity. The opposite side of subsite +1 from Arg572 is connected to a large empty space appearing to be subsite +2 for the binding of sophorotriose (Glc- $\beta$ -1,2-Glc- $\beta$ -1,2-Glc) in spite of the higher  $K_m$  value for sophorotriose than that for sophorose. The conformations of sophorose and laminaribiose are almost the same on the Arg572 side but differ on the subsite +2 side that provides no interaction with a substrate. Therefore, Lin1840r is unable to distinguish between sophorose and laminaribiose as substrates. These results provide the first mechanistic insights into  $\beta$ -1,2-glucooligosaccharide recognition by  $\beta$ -glucosidase.

## Introduction

$\beta$ -1,2-Glucan is a homo-polymer composed of glucose, as are cellulose ( $\beta$ -1,4-glucan) and laminarin ( $\beta$ -1,3-glucan), and is found mainly in some Gram-negative bacteria, such as *Agrobacterium*, *Rhizobium*, *Shinorhizobium*, and *Brucella*, as a cyclic form [1–5]. Cyclic  $\beta$ -1,2-glucan is known as an infectious or commensal factor in animals or plants and is used as a modulator of intracellular osmotic pressure after secretion into the extracellular space and accumulation in the periplasm [4–7]. Linear  $\beta$ -1,2-glucan is also found as an extracellular or periplasmic glucan with degrees of polymerization (DP) of 5–13 possessing  $\beta$ -1,6-glucosyl branches in *Escherichia coli* and *Pseudomonas syringae* [8–10]. In addition, sophorosides are found in some plants [11]. In contrast to the existence of  $\beta$ -1,2-glucan in nature, only a few  $\beta$ -1,2-glucan degrading enzymes has been reported. Though  $\beta$ -1,2-glucan-degrading glucanases and glucosidases induced by  $\beta$ -1,2-glucan have been reported in *Cytophaga (Chitinophaga) arvensicola*, a Gram negative bacterium, and *Acremonium* sp. 15, a filamentous anamorphic fungus [12,13], their amino acid sequences have not been elucidated.

Recently, the Lin1839 protein from *Listeria innocua* was identified as a 1,2- $\beta$ -oligoglucan phosphorylase (OGP), an enzyme specific to  $\beta$ -1,2-glucan. The cytosolic Lin1839 enzyme catalyzes reversible phosphorolysis of  $\beta$ -1,2-glucans with DP of 3 or more to produce  $\alpha$ -glucose 1-phosphate (G1P) [14], but the enzyme does not act on sophorose (Glc- $\beta$ -1,2-Glc, Sop<sub>2</sub>). Thus, it is likely that other enzymes are also required for complete dissimilation of  $\beta$ -1,2-glucans. In the gene cluster containing the *lin1839* gene, the *lin1840* gene encodes a putative glycoside hydrolase family (GH) 3  $\beta$ -glucosidase (BGL) (GenBank accession number: CAC97071.1) [15]. These facts led us to hypothesize that the Lin1840 protein is suitable for Sop<sub>2</sub> degradation, although there is no experimental evidence supporting this hypothesis.

GH3 is one of the major families containing BGLs along with GH1. BGLs form a large subgroup widely distributed in animals, plants, and microorganisms in GH3 containing *N*-acetyl- $\beta$ -D-glucosaminidases,  $\alpha$ -L-arabinofuranosidases and  $\beta$ -D-xylopyranosidases as well [16]. The substrate recognition residues and their structural positions for non-reducing end glucosides are highly conserved among GH3 BGLs. On the other hand, the substrate recognition sites in other moieties of substrates exhibit great diversification in the family, which leads to a variety of substrate and chain length specificities [17].

Lin1840 forms a clade with closely related homologs phylogenetically [18]. Only two enzymes have been characterized and/or are structurally available in the clade. Metagenomic GH3  $\beta$ -glucosidase from compost (JMB19063), which is the only structurally available enzyme, was reported to act on cellooligosaccharides ( $\beta$ -1,4-glucooligosaccharides, Cel<sub>n</sub>s) [18], and *Flavobacterium meningosepticum* GH3  $\beta$ -glucosidase (*Fm*BGL) has been identified as an aryl  $\beta$ -glucosidase [19]. The amino acid sequence identities of these two enzymes with Lin1840 are 42% and 40%, respectively. Arg587, which is one of the main residues comprising subsite +1 in JMB19063, is highly conserved among the closely related homologs (S1 Fig). The presence of a conserved arginine residue important for substrate recognition led us to expect a similar function among Lin1840, JMB19063, and *Fm*BGL. Cel<sub>n</sub>s were the only natural compounds tested as substrates for previous characterization of JMB19063 and *Fm*BGL. However, both enzymes have very low activity on Cel<sub>n</sub>s, whereas they show high activity toward *p*-nitrophenyl- $\beta$ -D-glucopyranoside (*p*NP- $\beta$ -Glc), an artificial substrate [18,19]. This means that previous reports of *Fm*BGL and JMB19063 characterization lack information supporting or denying the hypothesis that Lin1840 is involved in  $\beta$ -1,2-glucan metabolism in *L. innocua*. In this study, we describe the characteristics and structure-function relationship of the Lin1840 to provide the first mechanistic insight into recognition of  $\beta$ -1,2-glucooligosaccharides (Sop<sub>n</sub>s) by BGLs.

## Materials and Methods

### Preparation of recombinant Lin1840 and mutants

Gene cloning and overexpression of *lin1840* from *L. innocua* Clip11262 and purification of recombinant Lin1840 (Lin1840r) was described in our previous paper [20]. Briefly, the protein fused with a C-terminal His<sub>6</sub>-tag was purified from the cell extract of the transformant using a HisTrap FF crude column (5 ml; GE Healthcare, Buckinghamshire, England), and then was buffered with 50 mM 3-(*N*-morpholino)propanesulfonic acid (Mops) buffer (pH 7.0) using Amicon Ultra 30,000 molecular weight cut-off (Millipore, Billerica, MA, USA) for enzyme assay. The protein was further purified using Superdex 200 (Hiload 16/60; GE Healthcare) for crystallization. The molecular weight of Lin1840r in solution was estimated from the retention time. Ovalbumin (44 kDa), conalbumin (75 kDa), aldolase (158 kDa), ferritin (440 kDa), and thyroglobulin (669 kDa; GE Healthcare) were used as standard proteins. Blue dextran 2000 (2000 kDa; GE Healthcare) was used to determine the void volume of the column. Protein concentration was determined by UV absorbance at 280 nm (extinct coefficient [21] and theoretical molecular weight of Lin1840r are 67770 cm<sup>-1</sup>M<sup>-1</sup> and 80532.2 Da, respectively). Construction of plasmids for expression of the D270A, E473A, and R572K mutants was performed based on the protocol for a KOD-Plus-Mutagenesis Kit (Toyobo, Osaka, Japan) using pET-28a inserted with *lin1840* as a template, KOD Plus (TOYOBO, Osaka, Japan), and the primers described below. The primer pairs used for amplification of the D270A, E473A, and R572K mutant genes were 5'-TGGGGCGCTGTTGCCGAAGTAATTAATCAC-3' and 5'-CGCAGAAATAAGTACACCGTCAAACTCCA-3', 5'-CCCGCCCCATTCATTTTTTTTCACCTAGCGC-3' and 5'-GCGGCAGGAAGTCTTGCTACTATTCG-3', and 5'-GAGCGCCACAAACACCGGAAAATAAAGG-3' and 5'-CAGTGCGTAAATGATTATAATAAACTGG-3' (mutated nucleotides are underlined), respectively. Production and purification of the mutant enzymes were performed in the same way as for the WT.

### Enzyme assays using *p*-nitrophenyl-sugars

The substrate specificity of Lin1840r toward pNP- $\beta$ -Glc, pNP- $\beta$ -D-xylopyranoside, pNP- $\beta$ -D-fucopyranoside, pNP- $\beta$ -D-arabinofuranoside, and pNP- $\beta$ -D-galactopyranoside (Sigma Aldrich, St. Louis, MO, USA) was tested. Glycerol was used for stabilization of Lin1840r during the reaction. The reaction mixture comprising 50 mM 2-(*N*-morpholino)ethanesulfonic acid (Mes) buffer (pH 6.0), 5 mM substrate, 15% glycerol and Lin1840r in a total volume (20  $\mu$ l) was incubated at 20°C for 10 min. After incubation, 10  $\mu$ l of the reaction mixture was taken and mixed with 90  $\mu$ l of 0.2 M Na<sub>2</sub>CO<sub>3</sub> in a 96-well plate (EIA/RIA, plate, 96-well half area; Corning, NY, USA) to stop the reaction. The hydrolytic activity toward pNP-sugars was determined by measuring the absorbance at 405 nm derived from free pNP using a microplate reader (SpectraMax190; Molecular Devices, CA, USA). Various concentrations of pNP (0.005–0.5 mM) were used as standards.

### Kinetic analysis using pNP- $\beta$ -Glc and $\beta$ -linked gluco-oligosaccharides

To determine the kinetic parameters of pNP- $\beta$ -Glc hydrolysis, 70  $\mu$ l of a reaction mixture comprising 0.5–30 mM pNP- $\beta$ -Glc, 15% glycerol and 0.42  $\mu$ g of the enzyme in 50 mM Mes buffer (pH 6.0) was incubated at 20°C for 10 min. Ten  $\mu$ l aliquots of the reaction mixture were taken and then was mixed with 90  $\mu$ l of 0.2 M Na<sub>2</sub>CO<sub>3</sub> every 2 min to stop the reaction. Activity was determined as described above. The kinetic parameters were determined by non-linear regression of the data using an equation expressing substrate inhibition:  $v/[E_0] = k_{cat}[S]/(K_m + [S] + [S]^2/K_{is})$  (equation 1), where  $v$  is the initial velocity of pNP release,  $[E_0]$  the enzyme

concentration, and  $K_{is}$  the substrate inhibition constant. The kinetic analysis regarding  $\beta$ -linked gluco-oligosaccharides was performed using Sop<sub>n,s</sub> [14],  $\beta$ -1,2-glucans (average DP 25) [22], Lam<sub>n,s</sub> (BIOCON (JAPAN) LTD, Aichi, Japan), Cel<sub>2</sub> (Wako Pure Chemical Industries, Osaka, Japan), and Gen<sub>2</sub> (Tokyo Chemical Industry, Tokyo, Japan) as substrates. The reaction mixtures (70  $\mu$ l) comprising various concentrations of substrates, the enzyme, and 15% glycerol in 50 mM Mes buffer (pH 6.0) were incubated at 20°C for 10 min. At intervals of two minutes, 10  $\mu$ l aliquots of the mixtures were taken to stop the reaction by heat treatment at 99°C. Then the samples mixed with 90  $\mu$ l of GOPOD FORMAT KIT (Megazyme, Wicklow, Ireland) were incubated at 45°C for 20 min. When the substrates were Sop<sub>n</sub> and Lam<sub>n</sub>, 6  $\mu$ l aliquots of the samples and 114  $\mu$ l of GOPOD FORMAT KIT were mixed. The amounts of Glc released from oligosaccharides were calculated from absorbance at the 510 nm using 100  $\mu$ l aliquots of the solutions. The concentrations of Glc released from disaccharides were taken to be half since two Glc molecules were released in hydrolysis of one substrate molecule. The kinetic parameters were determined by fitting to equation 1 or the normal Michaelis-Menten equation.

### Temperature and pH profiles

The reaction conditions and the method for measuring released pNP were the same as described in the kinetic analysis section. The substrate used was 5 mM pNP- $\beta$ -Glc. The optimum temperature and pH were determined by measuring the activity at various temperatures (0–50°C) and in various pH ranges in the following buffers: sodium acetate (pH 4.0–5.5), Mes (pH 5.5–6.5), Mops (pH 6.5–7.5), 4-(2-hydroxyethyl)piperazine-1-(2-hydroxypropanesulfonic acid) (pH 7.5–8.5), and *N*-cyclohexyl-2-aminoethanesulfonic acid (pH 8.5–9.0). The thermal and pH stabilities were determined from the residual hydrolytic activity at 20°C after incubation of Lin1840r (0.1 mg/ml) at various temperatures in 50 mM Mes buffer (pH 6.0) for 1 h, and in 50 mM various buffers with the pH ranges described above at 20°C for 1 h, respectively. The incubated enzyme solutions were diluted at least 20 times with the reaction solution.

### Inhibition kinetics

Gluconic acid  $\delta$ -lactone (GDL) (Wako Pure Chemical Industries), isofagomine D-tartrate (IFG) (Toronto Research Chemicals Inc., Toronto, Canada), and 1-deoxynojirimycin (DNJ) (Wako Pure Chemical Industries) were used as inhibitors. The inhibitory effect on hydrolytic activity toward pNP- $\beta$ -Glc was measured with various substrates (1.5–10 mM) and inhibitor concentrations in 50 mM Mes buffer (pH 6.0) and 15% glycerol at 20°C. Kinetic parameters were determined using Grafit 7.0.3 by non-linear regression of the data using equations of competitive inhibition:  $v/[E_0] = k_{cat} [S]/\{K_m (1 + [I]/K_i) + [S]\}$  or mixed-type inhibition:  $v/[E_0] = k_{cat} [S]/\{K_m (1 + [I]/K_i) + [S] (1 + [I]/K_i')\}$ , where  $v$  is the initial velocity of pNP release,  $[E_0]$  the enzyme concentration,  $K_i$  the competitive inhibition constant, and  $K_i'$  the noncompetitive inhibition constant.

### Crystallography

Crystallization of the WT and D270A mutant was performed by the hanging-drop vapor-diffusion method. As described previously [20], 1  $\mu$ l of 10 mg/ml Lin1840r in 5 mM Mops (pH 7.0) mixed with 1  $\mu$ l of reservoir solution comprising 15% (v/v) glycerol, 0.17 M Li<sub>2</sub>SO<sub>4</sub>, 0.085 M Tris-HCl (pH 9.0), and 25.5% (w/v) PEG4000 was incubated at 25°C for 1 week for crystallization. Crystals were soaked in the reservoir solution supplemented with each ligand for 1 h to obtain complex structures. Crystals of WT were soaked in 150 mM Glc, 5 mM GDL, or 5 mM IFG. D270A crystals were soaked in 100 mM Sop<sub>2</sub>, 100 mM Sop<sub>3</sub>, 50 mM Lam<sub>2</sub>, 300 mM Cel<sub>2</sub>, or 300 mM Gen<sub>2</sub>. The crystals were cooled and then kept at 100 K in a nitrogen-gas stream during data collection. A set of X-ray diffraction data for the crystal was collected using a CCD

detector (ADSC Quantum 210r) on a beamline AR-NW12A at Photon Factory (Tsukuba, Japan). The diffraction data set was processed using iMosflm [23]. A model structure of Lin1840r was predicted using SWISS-MODEL (<http://swissmodel.expasy.org/>) [24] based on the A chain of *HvExoI* (PDB code; 1EX1), and then used as a search model for molecular replacement. Molecular replacement was performed using MOLREP [25] to determine initial phases. Automated model building was performed using ARP/wARP [26]. Manual model building and refinement were performed using Coot [27] and Refmac5 [28], respectively. Quality check of the structures was performed using wwPDB validation server (<http://wwpdb-validation.wwpdb.org/validservice/>). The figures were prepared using PyMOL (DeLano Scientific; <http://www.pymol.org>). The buried surface area was calculated with the protein-protein interaction interface server (PISA; [http://www.ebi.ac.uk/msd-srv/prot\\_int/pistart.html](http://www.ebi.ac.uk/msd-srv/prot_int/pistart.html)) [29].

## Results

### General properties of Lin1840r

The amino acid sequence of Lin1840 includes no predicted N-terminal signal peptide, as judged from SignalP 4.0 analysis (<http://www.cbs.dtu.dk/services/SignalP/>) [30], suggesting that the enzyme is localized in the cytosol. On size-exclusion chromatography, a recombinant Lin1840 protein was eluted as a 150 kDa one, suggesting that it is dimeric. The enzyme did not show significantly decreased catalytic activity on incubation up to 20°C in the pH range of 5.0–9.0, but drastically lost the activity at 40°C. The enzyme exhibited maximal catalytic activity at 37°C and pH 6.0. Asp270 and Glu473 in Lin1840r are predicted to be a catalytic nucleophile and a catalytic acid/base, respectively, according to primary sequence alignment with *FmBGL* [31,32].

### Substrate specificity

The substrate specificity of Lin1840r as to glycone was determined using several *p*-nitrophenyl (pNP)- $\beta$ -D-monosaccharides. The enzyme showed no activity toward any of those examined (less than 0.01 U/mg) except for pNP- $\beta$ -Glc, indicating that it specifically acts upon  $\beta$ -glucosides. The kinetic parameters of the enzyme toward pNP- $\beta$ -Glc were  $k_{\text{cat}} = 48 \pm 3$  ( $\text{s}^{-1}$ ),  $K_{\text{m}} = 3.1 \pm 0.3$  (mM), and  $k_{\text{cat}}/K_{\text{m}} = 15 \pm 1$  ( $\text{mM}^{-1} \text{s}^{-1}$ ). To investigate the linkage position specificity, kinetic parameters for  $\beta$ -linked gluco-disaccharides were determined (Table 1). Lin1840r showed large  $k_{\text{cat}}$  values for Sop<sub>2</sub> and Lam<sub>2</sub>, while the  $k_{\text{cat}}$  values for Cel<sub>2</sub> and gentiobiose (Glc- $\beta$ -1,6-Glc, Gen<sub>2</sub>) were less than 1% of those for Sop<sub>2</sub> and laminaribiose (Glc- $\beta$ -1,3-Glc, Lam<sub>2</sub>). The  $K_{\text{m}}$  values for Sop<sub>2</sub> and Lam<sub>2</sub> were similarly small, while the  $K_{\text{m}}$  values for Cel<sub>2</sub> and Gen<sub>2</sub> were approximately 7 and 13 times higher than that for Sop<sub>2</sub>, respectively. Consequently, the enzyme exhibited comparable  $k_{\text{cat}}/K_{\text{m}}$  values for Sop<sub>2</sub> and Lam<sub>2</sub>, while the values for Cel<sub>2</sub> and Gen<sub>2</sub> were both less than 0.05% of that for Sop<sub>2</sub>. The kinetic parameters for Sop<sub>2</sub> and Lam<sub>2</sub> were similar to those for pNP- $\beta$ -Glc. Then kinetic parameters for Sop<sub>n</sub>s were determined. The  $k_{\text{cat}}$  value for Sop<sub>3</sub> was similar to that for Sop<sub>2</sub>, but the  $k_{\text{cat}}$  values for Sop<sub>4</sub> and Sop<sub>5</sub> were less than one-tenth of that for Sop<sub>2</sub>. The  $K_{\text{m}}$  values for Sop<sub>3-5</sub> were 5 or more times higher than that for Sop<sub>2</sub>. Consequently, the catalytic efficiency decreased with the increase in DP remarkably. In the case of  $\beta$ -1,3-glucooligosaccharides (Lam<sub>n</sub>s), in contrast, the  $k_{\text{cat}}$ ,  $K_{\text{m}}$  or  $k_{\text{cat}}/K_{\text{m}}$  value did not markedly change with increasing DP, unlike in the case of Sop<sub>n</sub>s. The enzyme did not show significant hydrolytic activity toward  $\beta$ -1,2-glucan (reaction velocity, less than 0.01 U/mg in the presence of 1 mM substrate).

### Inhibition kinetics

The inhibition modes and constants for six inhibitors as to the hydrolytic activity toward pNP- $\beta$ -Glc are summarized in Table 2. Three glucosidase inhibitors, GDL, IFG, and DNJ,



**Table 1. Kinetic parameters of Lin1840r for β-linked gluco-oligosaccharides and pNP-β-Glc.**

| Substrate <sup>a</sup> |                  |                      | $k_{cat}$ (s <sup>-1</sup> ) | $K_m$ (mM) | $K_{is}$ (mM) | $k_{cat}/K_m$ (s <sup>-1</sup> mM <sup>-1</sup> ) |
|------------------------|------------------|----------------------|------------------------------|------------|---------------|---------------------------------------------------|
| WT                     | Sop <sub>2</sub> | (β-1,2) <sup>b</sup> | 41 ± 4                       | 2.0 ± 0.3  | 14 ± 4        | 21 ± 1                                            |
|                        | Sop <sub>3</sub> |                      | 56 ± 11                      | 15 ± 4     |               | 3.8 ± 0.3                                         |
|                        | Sop <sub>4</sub> |                      | 3.5 ± 0.9                    | 10 ± 4     |               | 0.34 ± 0.04                                       |
|                        | Sop <sub>5</sub> |                      | 1.0 ± 0.4                    | 11 ± 6     |               | 0.098 ± 0.020                                     |
|                        | Lam <sub>2</sub> | (β-1,3) <sup>b</sup> | 23 ± 1                       | 2.7 ± 0.2  |               | 8.8 ± 0.4                                         |
|                        | Lam <sub>3</sub> |                      | 11 ± 1                       | 3.7 ± 0.3  |               | 2.9 ± 0.1                                         |
|                        | Lam <sub>4</sub> |                      | 14 ± 5                       | 5.4 ± 2.5  | 2.5 ± 1.3     | 2.6 ± 0.2                                         |
|                        | Lam <sub>5</sub> |                      | 12 ± 5                       | 5.5 ± 2.8  | 2.7 ± 1.6     | 2.1 ± 0.2                                         |
|                        | Cel <sub>2</sub> | (β-1,4) <sup>b</sup> | 0.24 ± 0.01                  | 27 ± 1     |               | 0.0090 ± 0.0003                                   |
|                        | Gen <sub>2</sub> | (β-1,6) <sup>b</sup> | 0.076 ± 0.007                | 14 ± 2     | 150 ± 50      | 0.0054 ± 0.0005                                   |
|                        | pNP-β-Glc        |                      | 48 ± 3                       | 3.1 ± 0.3  |               | 15 ± 1                                            |
| R572K                  | Sop <sub>2</sub> |                      | 15 ± 1                       | 21 ± 2     |               | 0.69 ± 0.03                                       |
|                        | Lam <sub>2</sub> |                      | 14 ± 5                       | 9.2 ± 0.6  |               | 1.5 ± 0.1                                         |
|                        | Cel <sub>2</sub> |                      | 0.094 ± 0.005                | 68 ± 8     |               | 0.0014 ± 0.0005                                   |
|                        | Gen <sub>2</sub> |                      | 0.22 ± 0.01                  | 48 ± 5     |               | 0.0045 ± 0.0003                                   |

<sup>a</sup> Substrate concentrations used, 0.5–8 mM (Sop<sub>2</sub>), 0.5–8 mM (Sop<sub>3</sub>), 1–8 mM (Sop<sub>4</sub>), 1–8 mM (Sop<sub>5</sub>), 0.5–8 mM (Lam<sub>2</sub>), 0.5–8 mM (Lam<sub>3</sub>), 0.5–6 mM (Lam<sub>4</sub>), 0.75–6 mM (Lam<sub>5</sub>), 1–70 mM (Cel<sub>2</sub>), 1–80 mM (Gen<sub>2</sub>), and 0.5–30 mM (pNP-β-Glc) for WT and 1–15 mM (Sop<sub>2</sub>), 0.5–10 mM (Lam<sub>2</sub>), 5–100 mM (Cel<sub>2</sub>), and 1–90 mM (Gen<sub>2</sub>) for R572K.

<sup>b</sup> Linkages are shown in parentheses.

doi:10.1371/journal.pone.0148870.t001

consistently exhibited competitive-type inhibition with  $K_i$  values of less than 1 mM. IFG showed the strongest inhibition among all the inhibitors examined, the  $K_i$  value being 4.1 μM. While the  $K_i$  value of Lin1840r for IFG was similar to that of *Aspergillus aculeatus* BGL1 (*AaBGL1*) (14 μM), the  $K_i$  value of Lin1840r for DNJ (290 μM) was over 100 times higher than that of *AaBGL1* (2.4 μM) [33]. On the other hand, Glc, Cel<sub>2</sub>, and Gen<sub>2</sub> consistently showed mixed-type inhibition (Table 2). The  $K_i$  and  $K_i'$  values for Cel<sub>2</sub> were more than 5 times higher than those for Glc and Gen<sub>2</sub>.

**Table 2. Inhibition constants for inhibitors.**

| Inhibitor                     | Mode        | $K_i$ (mM)      | $K_i'$ (mM) |
|-------------------------------|-------------|-----------------|-------------|
| GDL <sup>a</sup>              | Competitive | 0.30 ± 0.04     |             |
| IFG <sup>b</sup>              | Competitive | 0.0041 ± 0.0005 |             |
| DNJ <sup>c</sup>              | Competitive | 0.29 ± 0.02     |             |
| Glc <sup>d</sup>              | Mixed       | 3.8 ± 0.6       | 90 ± 42     |
| Cel <sub>2</sub> <sup>e</sup> | Mixed       | 21 ± 5          | 470 ± 270   |
| Gen <sub>2</sub> <sup>f</sup> | Mixed       | 2.8 ± 0.4       | 38 ± 9      |

<sup>a</sup>Activity toward pNP-β-Glc (1.5–10 mM) in the presence of 0, 0.5, 1, and 5 mM GDL was used.

<sup>b</sup>Activity toward pNP-β-Glc (1.5–10 mM) in the presence of 0, 0.005, 0.025, and 0.05 mM IFG was used.

<sup>c</sup>Activity toward pNP-β-Glc (1.5–10 mM) in the presence of 0, 0.5, 1, and 2 mM DNJ was used.

<sup>d</sup>Activity toward pNP-β-Glc (2–10 mM) in the presence of 0, 5, 10, and 20 mM Glc was used.

<sup>e</sup>Activity toward pNP-β-Glc (2–10 mM) in the presence of 0, 10, 30, and 50 mM Cel<sub>2</sub> was used.

<sup>f</sup>Activity toward pNP-β-Glc (2–10 mM) in the presence of 0, 5, 10, and 20 mM Gen<sub>2</sub> was used.

doi:10.1371/journal.pone.0148870.t002

## Overall structure

The crystal structure of apo wild-type (WT) Lin1840r was determined at 1.8 Å resolution (S1 Table). The structure showed that Lin1840r forms a dimer of identical subunits each composed of three domains (Fig 1A). The structure of Lin1840r was compared with those of two GH3 enzymes, JMB19063 and barley GH3  $\beta$ -glucan-exohydrolase (*HvExoI*), exhibiting the highest similarity based on the Z-score with the Dali server ([http://ekhidna.biocenter.helsinki.fi/dali\\_server/](http://ekhidna.biocenter.helsinki.fi/dali_server/)) [34] (S2 Table). Lin1840r shows a similar overall structure to that of JMB19063. A loop (amino acids 568–598) in Lin1840r extends into the active site of the other subunit to form a part of the substrate pocket as in the case of the corresponding loop of JMB19063 (Fig 1 and S2A Fig). Therefore, the formation of the dimer is predicted to be important for the catalysis. Contrarily, *HvExoI* is a monomeric enzyme whose catalytic site is composed of a single subunit [35]. Lin1840r is composed of three domains based on Pfam (<http://pfam.xfam.org/>) [36]. There are some differences in each domain from those of JMB19063. In domain 1, the N-terminal region of Lin1840r (amino acids 34–53) forms an  $\alpha$  helix, whereas it forms a loop in JMB19063 (amino acids 29–48) [18] (S2B Fig). In domain 2, the helix and loop (amino acids 435–455) extending to the active site in JMB19063 are missing in Lin1840r (S2B Fig). In domain 3, clear electron density was observed (S2C Fig). The metal ion obviously undergoes six-coordination with the side chain of Asp648, the backbone carbonyl of Thr650, and four water molecules. The metal ion is suggested to be  $Mg^{2+}$  according to the server for checking metal ion binding ([http://csgid.org/csgid/metal\\_sites/](http://csgid.org/csgid/metal_sites/), [37]) (S2 Table), although a  $Mg^{2+}$  ion was not added to Lin1840r in any step of sample preparation.

## Subsite –1 of Lin1840r

The active center of Lin1840r is located at the interface of domains 1 and 2 as in the cases of known GH3 BGLs. The two predicted catalytic residues, Asp270 and Glu473, occupy similar positions to the corresponding Asp residues (catalytic nucleophile) and Glu residues (catalytic acid/base), respectively, of the known enzymes (S3 Fig). In fact, the D270A and E473A mutants showed no detectable hydrolytic activity toward pNP- $\beta$ -Glc. This result supports the assignment of Asp270 and Glu473 as the catalytic nucleophile and catalytic acid/base residues, respectively. A distance between side chain carboxyl oxygen atoms of Asp270 and Glu473 is approximately 6.0 Å, suggesting that the enzyme follows retaining mechanism.

The Lin1840r-Glc complex structure was determined to understand the substrate recognition at subsite –1. Six residues (Asp91, Arg149, Lys191, His192, Asp270, and Glu473) constitute subsite –1 and form hydrogen bonds with the Glc molecule (S3 Fig). These residues can be well superimposed on the corresponding residues of the known structures of GH3 BGLs.

## Complexes with inhibitors

To clarify the binding modes of inhibitors, Lin1840r-inhibitor complex structures were determined. In complex structures with IFG and GDL, which are Glc analogs, the ligands are located at the same position as Glc (Fig 2A, 2B and S3 Fig), suggesting that IFG and GDL compete with substrates for subsite –1. In the GDL complex, electron densities of glycerol molecules were observed between the aromatic rings of Tyr583 and Trp271 (Fig 2A). A GDL molecule can be fitted to a large electron density near Trp409 (outside the active center) and undergo hydrophobic stacking with Trp409, but the orientation of the molecule is obscure (Fig 2A). The structure of the GDL complex is not substantially different from those of the apo WT and Glc complex. In the case of the IFG complex structure, on the other hand, an unwound helix (amino acids 36–47) in domain 1 is inserted between the aromatic rings of Tyr583 and Trp271.

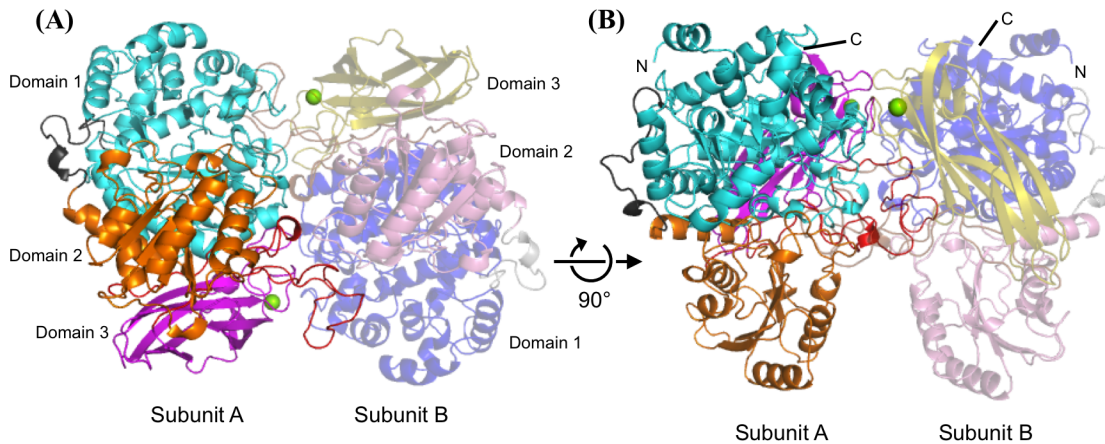

**Fig 1. Overall structure of Lin1840r.** (A) Lin1840r is a dimer composed of subunits A and B. Domains 1 ( $(\beta/\alpha)_8$  triose phosphate isomerase barrel fold, amino acids 1–339), 2 ( $(\alpha/\beta)_6$  sandwich fold, amino acids 360–543), and 3 (fibronectin type III (FnIII) family, amino acids 605–723) in subunit A are presented in *cyan*, *orange*, and *magenta*, respectively. The loop extending to the active center in subunit B (amino acids 543–604), and the linker region that connects domains 1 and 2 (amino acids 340–359) are shown in *red* and *black*, respectively. The corresponding three domains, loop, and linker in subunit B are presented in semitransparent *blue*, *pink*, and *yellow*, *brown*, and *gray*, respectively.  $Mg^{2+}$  ions are shown as *green* spheres. N-terminal and C-terminal regions of both subunits are denoted by N and C, respectively.

doi:10.1371/journal.pone.0148870.g001

Thr40 in this loop forms a hydrogen bond with the 6-OH group of IFG (Fig 2B). This loop might be involved in substrate binding in solution.

### Complex structures with Sop<sub>2</sub> and Lam<sub>2</sub>

In order to understand the recognition mechanism of Sop<sub>2</sub> and Lam<sub>2</sub>, the complex structures with these disaccharides were determined using the nucleophile D270A mutant of Lin1840r. The electron density of Sop<sub>2</sub> was clearly observed in the D270A structure on soaking in 100 mM Sop<sub>2</sub> and fitted only with the  $\beta$ -anomer (Fig 3A left). The significant electron density of a ligand was also observed on soaking in 50 mM Lam<sub>2</sub> and clearly fitted with both anomers of Lam<sub>2</sub> (Fig 3B left). The Glc moieties of both Sop<sub>2</sub> and Lam<sub>2</sub> at subsite –1 are located at almost

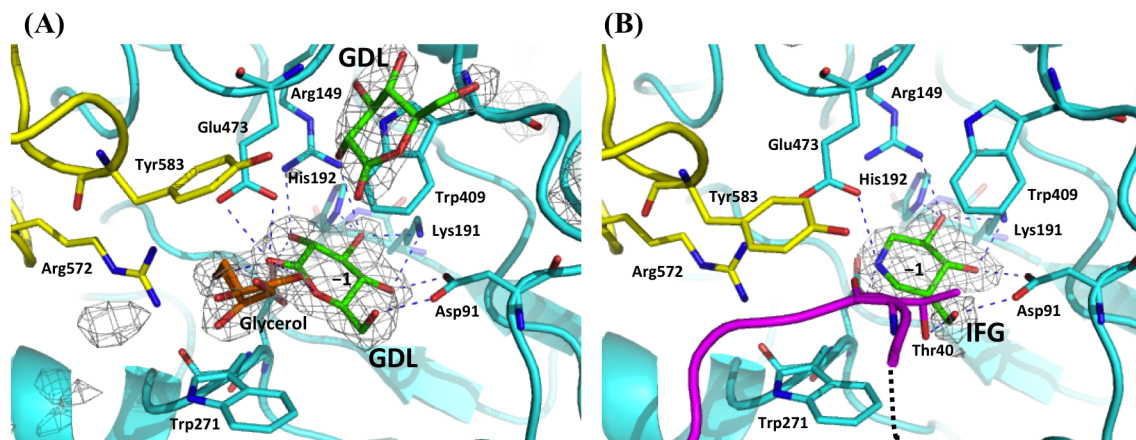

**Fig 2. Complexes with GDL (A), and IFG (B).** The two subunits comprising the catalytic pocket are shown in *cyan* and *yellow*. Residues involved in ligand binding are shown as sticks. The Leu39–Met47 loop seen in the IFG complex is shown in *magenta* and the disordered loop region (Gly32–Glu38) are shown in a *black dotted* line. Inhibitors and glycerol are represented as *green* and *orange* sticks, respectively.  $F_o - F_c$  electron density maps of GDL and IFG are shown as a *gray* mesh (contoured at 3.0 $\sigma$  and 4.0 $\sigma$ , respectively). GDL and glycerol (A) and IFG (B) were omitted for calculation of the  $F_o - F_c$  maps. Hydrogen bonds are presented as *blue dotted* lines.

doi:10.1371/journal.pone.0148870.g002



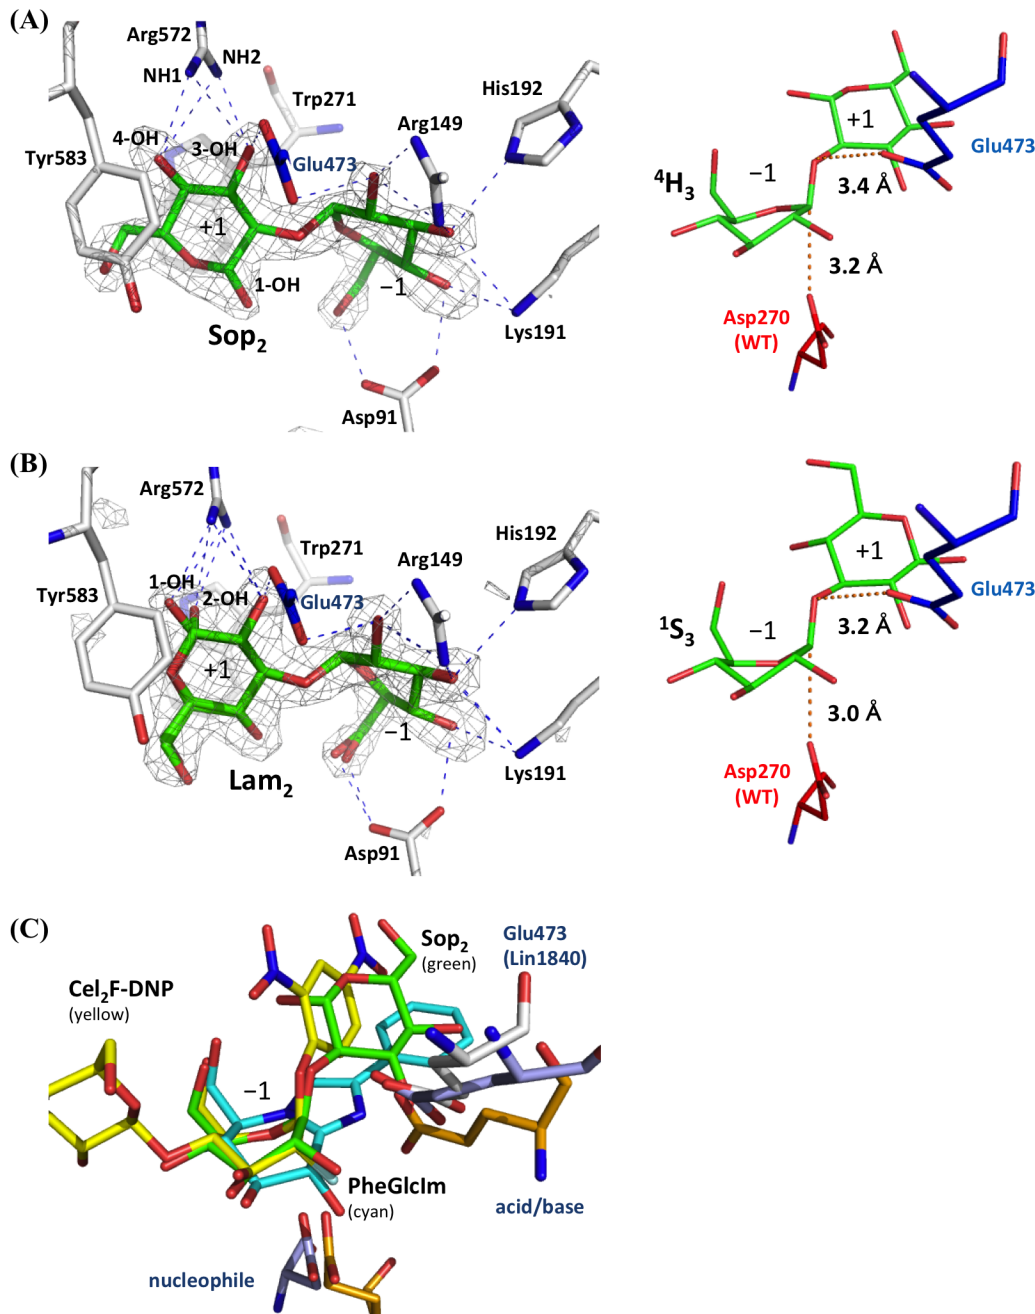

**Fig 3. D270A-Sop<sub>2</sub> and D270A-Lam<sub>2</sub> complexes.** (A, B) Substrate pockets of D270A-Sop<sub>2</sub> (A) and D270A-Lam<sub>2</sub> (B) complexes. Ligands are shown as green sticks. Acid-base residues are shown in blue. (Left) Electron density maps of ligands. The  $F_o - F_c$  electron density maps of the ligands are presented as a gray mesh (contoured at  $3.0\sigma$ ). Sop<sub>2</sub> and Lam<sub>2</sub> are omitted for calculation of the  $F_o - F_c$  maps. Several hydroxy groups of ligands are labeled. Hydrogen bonds are presented as blue dotted lines. Lam<sub>2</sub> in the D270A-Lam<sub>2</sub> complex (B) is a mixture of both anomers. Distances between Arg572 and ligands are summarized in S3 Table. (Right) Conformations of ligands at subsite -1. The position of the catalytic nucleophile (Asp270) determined on superpositioning with apo WT is shown in red. The distances between two atoms linked by red dotted lines are given. (C) Comparison of conformation of Sop<sub>2</sub> with those of ligands in Michaelis complex and transition state-like complexes at subsite -1. Sop<sub>2</sub>, Cel<sub>2</sub>F-DNP in BaCel5A (Michaelis complex), and PheGlcIm in HvExo1 (transition state) are shown in green, yellow, and cyan sticks, respectively. Catalytic residues of Lin1840r, HvExo1, and BaCel5A are shown in white, bright orange, and light blue, respectively.

doi:10.1371/journal.pone.0148870.g003

the same positions as the ligands in WT-inhibitors complexes despite the replacement of the catalytic nucleophile with alanine. The reducing end Glc moieties of Sop<sub>2</sub> and Lam<sub>2</sub> are consistently stacked on Trp271 and Tyr583, and form four hydrogen bonds with Arg572 (S3 Table), suggesting that these three residues constitute subsite +1. The fact that Tyr583 and Arg572 are derived from a loop in the adjacent subunit indicates the participation of both subunits in formation of the catalytic pocket.

The results of Cremer-Pople ring pucker parameters calculator analysis (<http://www.ric.hi-ho.ne.jp/asfushi/>) [38] showed that the pyranose rings of Sop<sub>2</sub> and Lam<sub>2</sub> at subsite -1 are <sup>4</sup>H<sub>3</sub> and <sup>1</sup>S<sub>3</sub>, respectively. Since proposed itinerary of ring conformation to the substrate-enzyme intermediate in H<sub>v</sub>ExoI is <sup>4</sup>C<sub>1</sub> (pre-Michaelis complex)  $\leftrightarrow$  <sup>1</sup>S<sub>3</sub> (Michaelis complex)  $\leftrightarrow$  <sup>4</sup>E (<sup>4</sup>H<sub>3</sub>) (transition state)  $\leftrightarrow$  <sup>4</sup>C<sub>1</sub> (intermediate) [39,40], conformation of Lam<sub>2</sub> is considered to correspond with Michaelis complex. Sop<sub>2</sub> complex is also considered as Michaelis complex in spite of its conformation, since Sop<sub>2</sub> is not superimposed with glucophenylimidazole (PheGlcIm) known as a transition-like analog in H<sub>v</sub>ExoI [40] but with ligands known as Michaelis complex, such as 2',4'-dinitrophenyl-2-deoxy-2-fluoro- $\beta$ -D-cellobioside (Cel<sub>2</sub>F-DNP) in GH5 *Bacillus agaradhaerens endo*- $\beta$ -1,4-glucanase (BaCel5A), a retaining enzyme [41] (Fig 3C). In addition, the Sop<sub>2</sub> molecule does not possess a trigonal anomeric center necessary to be judged as transition state. In the Sop<sub>2</sub> and Lam<sub>2</sub> complexes, the angles defined by the oxygen atom of the glycosidic bond, the anomeric carbon atoms in the ligands, and the carboxyl group in the catalytic nucleophile are 165° and 164°, respectively, as in the case of GlcNAc-MurNAc in a nucleophile mutant of GH3 *B. subtilis* N-acetyl- $\beta$ -D-glucosaminidase and Cel<sub>2</sub>F-DNP in BaCel5A [41,42]. Dihedral angles of Sop<sub>2</sub> and Lam<sub>2</sub> (O2-C1-O5-C5 in non-reducing end) are 93.4° and 88.3°, respectively, implying that the lone pairs on the both endocyclic oxygen atoms almost face antiperiplanar to the scissile bonds. These facts suggest that the nucleophile is able to mount an in-line attack on the anomeric carbon (Fig 3A and 3B right) [43]. The distances between the catalytic nucleophile and the anomeric carbon at subsite -1 are 3.2 Å and 3.0 Å, respectively, and the distances between the catalytic acid-base and oxygen atoms of the glycosidic bond are 3.4 Å and 3.2 Å, respectively (Fig 3A and 3B right). These distances are within the possible range of the reaction [44]. These facts suggest that the ligands are positioned, as they would be in catalytically active complexes. This is the first report of a Michaelis complex for GH3 BGLs, though pre-Michaelis complexes have been reported for H<sub>v</sub>ExoI [39,40].

The anomeric hydroxy group of reducing end glucosides in Sop<sub>2</sub> is exposed to the solvent, in the vicinity of Asp91. In the case of Lam<sub>2</sub>, the hydroxy group is exposed outside the substrate pocket, this being consistent with similar activity among Lam<sub>n</sub>s.

## Complexes with Sop<sub>3</sub>, Cel<sub>2</sub>, and Gen<sub>2</sub>

Soaking of the D270A mutant crystal in 100 mM Sop<sub>3</sub> resulted in clear observation of electron density corresponding to the middle Glc moiety of Sop<sub>3</sub> at subsite +1 (S4A Fig). The electron densities of glycoside moieties at both the non-reducing and reducing ends might be derived from Sop<sub>3</sub> but they were so weak that interpretation was difficult. The electron density of the Glc moiety was not observed at subsite -1. In the Cel<sub>2</sub> and Gen<sub>2</sub> complex structures, electron densities of Glc moieties were also both observed at subsite +1 (S4B and S4C Fig). These Glc moieties were thought to be the non-reducing ends of Cel<sub>2</sub> and Gen<sub>2</sub> due to the orientation of the hydroxy group participating in the glycosidic linkage (S4B and S4C Fig), suggesting that Cel<sub>2</sub> or Gen<sub>2</sub> binds to the enzyme non-productively. In the both complexes, Glc molecules were observed only in molecule A. This might be due to impurity in quite high concentrations of soaked substrates. In the Cel<sub>2</sub> complex, Trp409 stacks on another Glc moiety unlike in the cases of the Sop<sub>3</sub> and Gen<sub>2</sub> complexes (S4 Fig).

## Kinetic analysis of the R572K mutant

It is suggested that Arg572 is an important residue for the recognition of Sop<sub>2</sub>, since it forms multiple hydrogen bonds with substrates at subsite +1 (Fig 3A and 3B left). We therefore characterized the R572K mutant. The kinetic parameters of the R572K mutant enzyme as to  $\beta$ -linked gluco-disaccharides are summarized in Table 1. The  $K_m$  value of the mutant enzyme for Sop<sub>2</sub> was 10 times higher than that of the WT enzyme. The mutant enzyme also showed increased  $K_m$  values for the other substrates, and 1.5–3.0 times smaller  $k_{cat}$  values for Sop<sub>2</sub>, Lam<sub>2</sub>, and Cel<sub>2</sub>. As a result, the  $k_{cat}/K_m$  value of the R572K mutant for Sop<sub>2</sub> was over 25 times smaller, while the extent of reduction of the  $k_{cat}/K_m$  value for Lam<sub>2</sub> caused by the mutation was approximately 6 times. This indicates that Arg572 is important for substrate binding, especially for Sop<sub>2</sub>.

## Comparison of substrate pockets

In order to investigate the importance of Arg572 and subsite +2, the substrate pocket of Lin1840r was compared with those of JMB19063, a homolog in the same clade as Lin1840, and homologs in the different clade from Lin1840. Trp271, Tyr583, and Arg572 constitute subsite +1 in Lin1840r. They can be well superimposed on the corresponding residues in JMB19063 (Tyr262, Phe598, and Arg587, respectively) (Fig 4A). Tyr583 and Arg572 are derived from the other subunit, as observed for the corresponding residues of JMB19063. Contrarily, in the other structurally known GH3 BGLs, each subsite +1 comprises one subunit.

The Trp271 residue is conserved in other structurally available GH3 BGLs, including *HvExoI*,  $\beta$ -glucosidase from *Kluyveromyces marxianus* (*KmBglI*) [45], *AaBGL1* [33],  $\beta$ -glucosidase from *Trichoderma reesei* (*TrCel3A*) [46] which act on a variety of substrates containing cellobiose unlike Lin1840r, and aryl  $\beta$ -glucosidase from *Thermotoga neapolitana* (*TnBgl3B*) [47]. The corresponding residues in most GH3 BGLs are aromatic amino acids. The Trp286 residue in *HvExoI* stacks on the Glc moiety of the ligand at subsite +1, while Trp226 of *KmBglI*, Trp281 of *AaBGL1*, Trp237 of *TrCel3A*, and Trp243 of *TnBgl3B* participate in recognition of ligands at subsite –1 (Fig 4B–4F).

At the position corresponding to the Tyr583 residue, most structurally known GH3 BGLs have an aromatic amino acid, while the *TnBgl3B* structure lacks an aromatic residue probably due to disorder of the corresponding region. The Tyr583 residue and the corresponding residues of JMB19063, *KmBglI*, *AaBGL1*, and *TrCel3A* (Phe598, Phe508, Tyr511, and Trp443, respectively) are consistently located on loops extending from the acid-base catalyst residue side (Fig 4A and 4C–4E). On the other hand, Trp434 in *HvExoI* is on the loop extending from the opposite side (Fig 4B). Lin1840r and JMB19063 consistently lack this loop, and instead have empty spaces sufficiently large for glycoside binding (Fig 4A). This space is considered to be subsite +2, since the anomeric hydroxy group of reducing end glucosides in Sop<sub>2</sub> faces the space (Fig 4A right). The spaces are filled with loops in *KmBglI*, *AaBGL1*, and *TrCel3A* (Fig 4C–4E).

The Arg572 residue in the substrate pocket is located at a similar position to Arg291 of *HvExoI* (Fig 4B). However, Arg291 does not correspond with the Arg572 residue in terms of primary sequence, and *HvExoI* does not have any corresponding loop for the Arg572 residue. The Arg291 residue is localized farther away from the center of the catalytic pocket than Arg572 (Fig 4B). *KmBglI*, *AaBGL1*, *TrCel3A*, and *TnBgl3B* possess no residue that corresponds to Arg572 or Arg291 (Fig 4C–4F). Gly57 in the loop of *HvExoI* (amino acids 54–66) participates in substrate recognition on the opposite side of subsite +1 from Arg291 [48] (Fig 4B). *KmBglI*, *AaBGL1*, and *TrCel3A* possess Phe55, Arg98, and Arg67, respectively, at the position

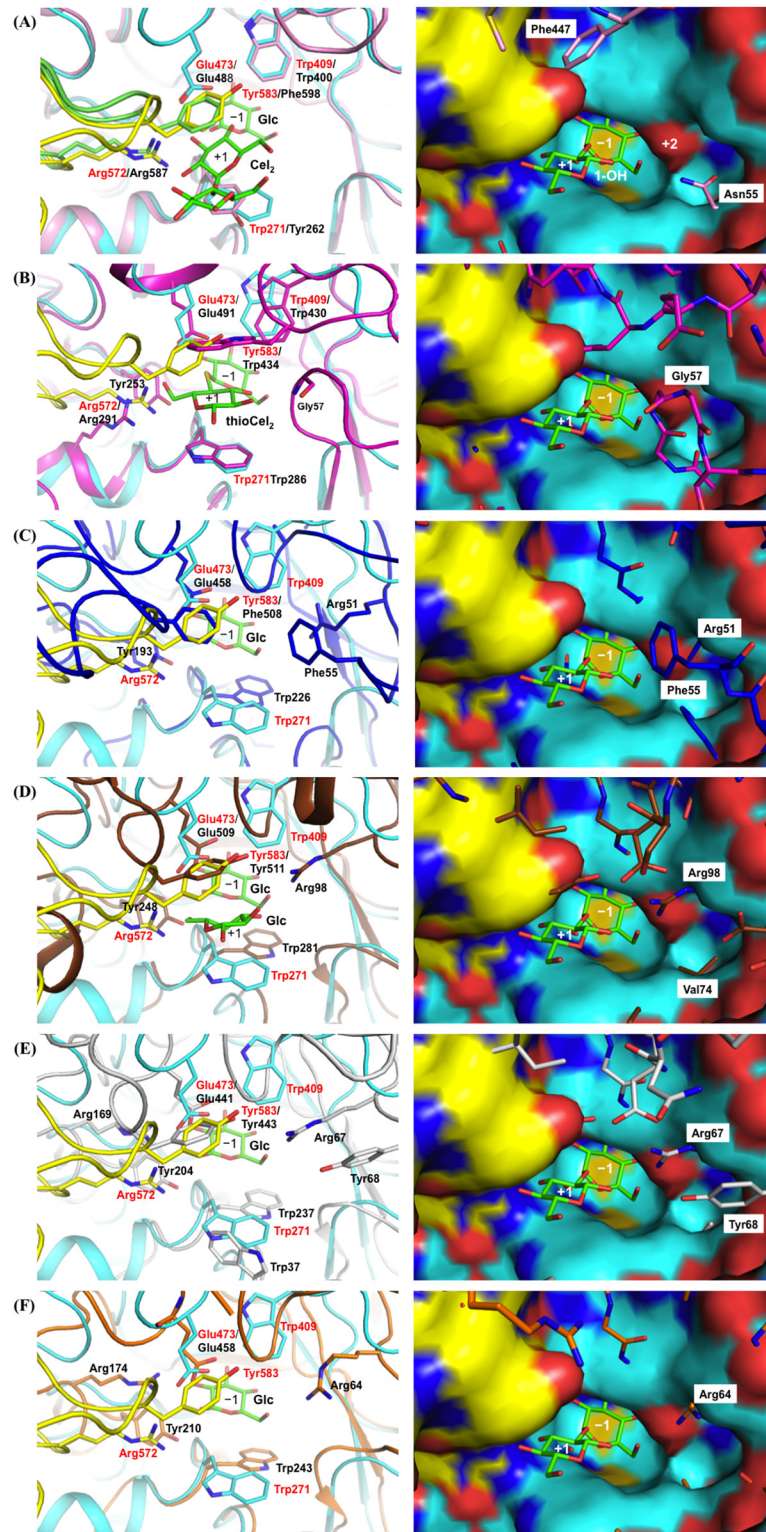

**Fig 4. Comparison of the active centers in Lin1840r and GH3 BGLs.** Apo WT Lin1840r is superimposed on (A) JMB19063, (B) *HvExol* (PDB code 1IEX), (C) *KmBglI* (PDB code 3AC0), (D) *AaBGL1* (PDB code 4IIg), (E) *TrCel3A* (PDB code 3ZYZ), and (F) *TnBgl3B* (PDB code 2X41). (Left) Domains 1 and 2 of apo WT Lin1840r are shown in cyan, and the loop extending from the other subunit is shown in yellow. The corresponding domains and loop of JMB19063 are shown in pink and green, respectively. *HvExol*, *KmBglI*,



AaBGL1, TrCel3A, and TrBgl3B are colored *magenta*, *blue*, *brown*, *gray*, and *orange*, respectively. Residues constituting the subsites are represented as sticks. The residue names in Lin1840r and the other enzymes are shown in *red* and *black*, respectively. (Right) The D270A-Sop<sub>2</sub> complex was used in place of the apo WT enzyme. D270A is shown as a surface representation. The superimposed GH3 BGLs are shown as sticks. Sop<sub>2</sub> in the D270A-Sop<sub>2</sub> complex is represented as a *green* stick. All ligands shown in the *left* figures are omitted in the *right* figures. (A) An anomeric hydroxy group of Sop<sub>2</sub> is labeled.

doi:10.1371/journal.pone.0148870.g004

corresponding to Gly57 (Fig 4C–4E). On the other hand, Lin1840r has no corresponding loop (Fig 4A).

## Discussion

In this study, the hydrolytic activity of Lin1840r toward Sop<sub>n</sub>s was determined since the *lin1839* gene in the same gene cluster as *lin1840* encodes an enzyme specific to  $\beta$ -1,2-glucan. Lin1840r showed obvious preference for Sop<sub>2</sub> among Sop<sub>n</sub>s (Table 1). Considering that Lin1839 phosphorylates  $\beta$ -1,2-glucan with DP 3 or more to produce G1P but does not act on Sop<sub>2</sub> [14], Lin1840 and Lin1839 cooperatively metabolize  $\beta$ -1,2-glucan in the cytosol. Since phosphorylation of glucose without the use of ATP is beneficial for energy acquisition, it is advantageous that BGLs show strong preference for substrates on which phosphorylases do not act. These facts suggest that Lin1840 is a BGL for Sop<sub>2</sub> degradation.

Nevertheless, structural analysis showed that Lin1840r possesses a sufficiently large space, which appears to be subsite +2, for access of Sop<sub>3</sub>. This space is needed only for binding of Sop<sub>n</sub>s, as judged from the orientations of the anomeric hydroxy groups of Sop<sub>2</sub> and Lam<sub>2</sub> in Lin1840r structures (Fig 3), and thioCel<sub>2</sub> (Fig 4B) [35] and methyl  $\beta$ -thiogentiobiose (PDB ID, 3WLP) in H $\nu$ ExoI structures. The corresponding spaces are filled in other structurally available GH3 BGLs except JMB19063 (Fig 4A–4E). However, the presence of Sop<sub>3</sub> accessible space at subsite +2 cannot explain the kinetic result that Lin1840r showed a much higher  $K_m$  value toward Sop<sub>3</sub> than that toward Sop<sub>2</sub>. The conformation of Sop<sub>3</sub> is likely related to the difference in the  $K_m$  values. According to molecular dynamics simulation, Sop<sub>3</sub> adopts a stable conformation that includes an intramolecular hydrogen bond between the 3-OH group of the reducing end glucoside and the oxygen atom of the pyranose ring or 6-OH group of the non-reducing end glucoside [49]. These intramolecular hydrogen bonds in Sop<sub>3</sub> have to be removed and the glycosidic bond of Sop<sub>3</sub> at the reducing end also has to be distorted for productive binding of Sop<sub>3</sub>. Overall, subsite +2 might be an evolutionary relic of specialization of Lin1840 from a Sop<sub>n</sub>s degrading enzyme to one specialized at Sop<sub>2</sub> degradation.

In spite of the estimated function of Lin1840, Lin1840r shows comparable activity toward Lam<sub>2</sub> with Sop<sub>2</sub>. The presence of Arg572 at subsite +1 and the space of subsite +2 are important features for substrate recognition. Arg572 forms many hydrogen bonds with Sop<sub>2</sub> or Lam<sub>2</sub> at subsite +1, and thereby likely compensates for the lack of any hydrogen-bond interaction with the substrates on the subsite +2 side (Figs 3A and 5A). The binding modes of Sop<sub>2</sub> and Lam<sub>2</sub> are apparently very similar in the Lin1840r complexes. The structures of the bound Sop<sub>2</sub> and Lam<sub>2</sub> molecules only differ in the substituting groups of reducing end glucosides on the subsite +2 side (Fig 5). This observation thus indicates that Lin1840r is not able to distinguish between Sop<sub>2</sub> and Lam<sub>2</sub>. BGLs from *C. arvensicola* and *Acremonium* sp. 15 induced by  $\beta$ -1,2-glucan show similar substrate specificities for  $\beta$ -linked gluco-disaccharides to Lin1840 [12, 13]. They might have similar structural features to Lin1840r, though their amino acid sequences are unavailable.

Unlike Lam<sub>2</sub>, Arg572 effectively excludes Cel<sub>2</sub> as a substrate. This can be explained by comparison of the D270A-Sop<sub>2</sub> and H $\nu$ ExoI-thiocellobiose (thioCel<sub>2</sub>) complex structures. Arg291 in H $\nu$ ExoI, which corresponds to Arg572 in Lin1840r, is located farther from the center of the



(A)

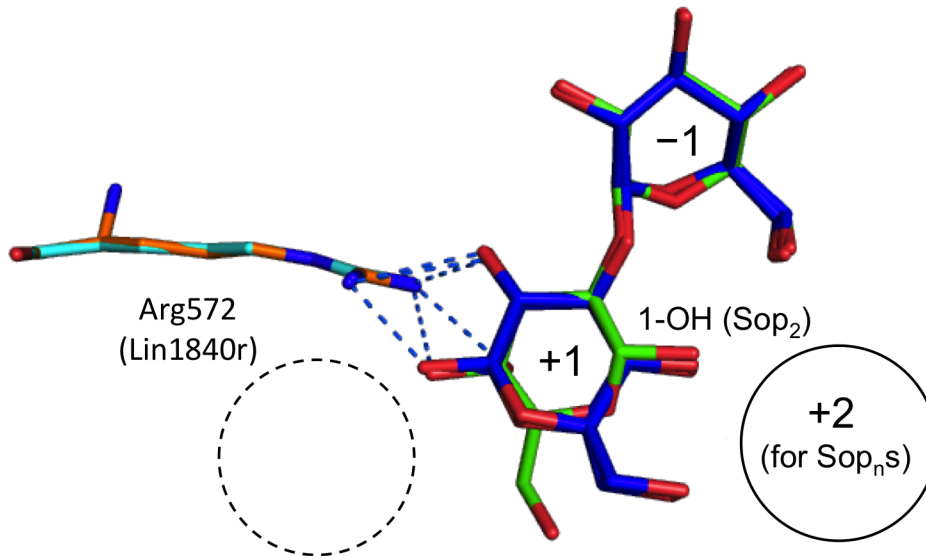

(B)

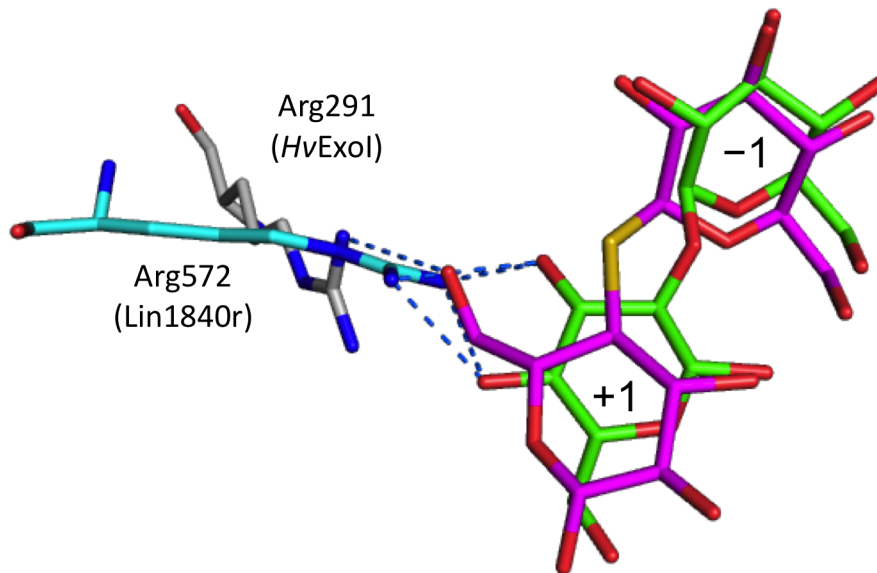

**Fig 5. Comparison of conformations of ligands in Lin1840r and HvExol.** Hydrogen bonds are represented as *blue dotted* lines. Subsites -1, +1, and +2 are labeled. **(A)** Comparison of Sop<sub>2</sub> and Lam<sub>2</sub> in the D270A mutant. Arg572 and Sop<sub>2</sub> in the D270A-Sop<sub>2</sub> complex are shown in *cyan* and *green*, respectively. Arg572 and Lam<sub>2</sub> of both anomers in the D270A-Lam<sub>2</sub> complex are colored *orange* and *blue*, respectively. Putative subsite +2 for Sop<sub>n,s</sub> and potential subsite +2 for Lam<sub>n,s</sub> are shown in a solid and dotted circle, respectively. An anomeric hydroxy group of a reducing-end glucoside in Sop<sub>2</sub> is labeled. **(B)** Comparison of Sop<sub>2</sub> in the D270A mutant and thioCel<sub>2</sub> in HvExol. The residue and ligand in the D270A-Sop<sub>2</sub> complex are shown in the same as in **(A)**. Arg291 and thioCel<sub>2</sub> in HvExol-thioCel<sub>2</sub> are presented in *gray* and *magenta*, respectively.

doi:10.1371/journal.pone.0148870.g005

substrate pocket than Arg572 (Figs 4B and 5B). The 6-OH group of the reducing end glucoside of thioCel<sub>2</sub> forms a hydrogen bond with Arg291. However, the distance between Arg572 and the 6-OH of the glucoside in thioCel<sub>2</sub> is so close as to cause steric hindrance (Fig 5B). Actually, Cel<sub>2</sub> binds to Lin1840r in the non-productive form. In addition, other structurally available GH3 BGLs (*TnBgl3B*, *TrCel3A*, *AaBGL1* and *KmBglI*), which lack a residue corresponding to Arg572 (Fig 4C–4F), consistently show sufficient hydrolytic activity toward Cel<sub>2</sub> [45,46,47,50]. These observations suggest that Arg572 accounts for much higher *K<sub>m</sub>* value for Cel<sub>2</sub> than those for Sop<sub>2</sub> and Lam<sub>2</sub>. Considering that Sop<sub>2</sub> and Lam<sub>2</sub> complexes mimic Michaelis complex,

Arg572 is also related with differences in  $k_{\text{cat}}$  values between Cel<sub>2</sub> and Sop<sub>2</sub>/Lam<sub>2</sub>. Thus, Arg572 is important for substrate specificity in Lin1840r.

The Arg572 residue is highly conserved among closely related homologs such as JMB19063 and *FmBGL*. Nevertheless, JMB19063 is thought to be involved in cellulose degradation and *FmBGL* is described as an aryl  $\beta$ -glucosidase. JMB19063 shares structural features important for substrate specificity with Lin1840. Therefore, we compared the substrate specificities of the three enzymes. The specific activity of JMB19063 toward Cel<sub>2</sub> (0.1 mM Cel<sub>2</sub> at 50°C) estimated from the substrate consumption is only 0.077 (U/mg), whereas JMB19063 shows high hydrolytic activity toward pNP- $\beta$ -Glc (11.8 U/mg on 0.1 mM pNP- $\beta$ -Glc) [18]. The specific activities of Lin1840r for pNP- $\beta$ -Glc and Cel<sub>2</sub> (0.1 mM at 20°C) are 1.12 (U/mg) and  $8.9 \times 10^{-4}$  (U/mg), respectively. In addition, *FmBGL* shows similar levels of kinetic parameters for pNP- $\beta$ -Glc ( $k_{\text{cat}} = 39.1 \text{ s}^{-1}$ ,  $K_{\text{m}} = 0.49 \text{ mM}$ ) to Lin1840r but at least 100 times lower activity toward Cel<sub>2</sub>, as judged from preliminary results, than toward pNP- $\beta$ -Glc [19,32]. Thus, the three enzymes show a similar tendency in substrate specificity as to pNP- $\beta$ -Glc and Cel<sub>2</sub>. It should be noted that Lin1840r shows comparable activity toward Sop<sub>2</sub> and Lam<sub>2</sub> as glycoside hydrolases, while the activities of JMB19063 and *FmBGL* toward Sop<sub>2</sub> and Lam<sub>2</sub> have not been reported. Moreover, the structure of the Lin1840r-Cel<sub>2</sub> complex was compared with that of the JMB19063-Cel<sub>5</sub> complex, which contains Glc in subsite -1 and Cel<sub>2</sub> outside subsite -1 [18] (Fig 4A). This complex is the same as the Cel<sub>2</sub> complex of Lin1840r in that subsites +1 and -1 are filled with separate molecules (S4B Fig). Moreover, while ThioCel<sub>2</sub> in the *HvExoI*-thioCel<sub>2</sub> complex forms the intrinsically stable conformation of Cel<sub>2</sub>, glucoside at subsite +1 in the Cel<sub>5</sub>-soaked JMB19063 complex is inverted compared to that of ThioCel<sub>2</sub> (Figs 4A and 5A). Thus, the Cel<sub>5</sub>-soaked JMB19063 complex seems to be in the non-productive form, as in the case of the Cel<sub>2</sub>-Lin1840r complex. Overall, it would not be surprising if JMB19063 and *FmBGL* show similar substrate specificity to Lin1840r.

This study strongly suggests that Lin1840 is a BGL for Sop<sub>2</sub> degradation, and that Arg572 and subsite +2 are the key factors for its substrate specificity. This is not only a significant revelation in the field of  $\beta$ -1,2-glucan metabolizing enzymes but also evoke the need for reevaluation of the functions of closely related homologs with Lin1840 possessing arginine residues corresponding with the Arg572.

## Supporting Information

**S1 Fig. Multiple alignment of closely related homologs with Lin1840.** Multiple alignment was performed using T-COFFEE multiple alignment server (<http://tcoffee.vital-it.ch/apps/tcoffee/index.html>) [51]. The amino acid sequences are selected evenly among the clade of Lin1840. The amino acid sequence of JMB19063 is based on the PDB (accession number, 3U48). The GenBank accession number of *FmBGL* is AAB66561.1. Uncharacterized proteins are presented as accession numbers. AEB30119.1, AEE54288.1, AEW02328.1, EEV33587.1, ELK47769.1, ERI92988.1, and ETT38232.1 are the GenBank accession numbers of homologous genes from *Carnobacterium* sp. 17-4, *Haliscomenobacter hydrossis* DSM 1100, *Niastella koreensis* GR20-10, *Enterococcus gallinarum* EG2, *Halobacillus* sp. BAB-2008, *Clostridiales bacterium* oral taxon 876, and *Paenibacillus* sp. FSL R5-808, respectively. 515950490 and 544876686 are the Geneinfo identifier numbers of homologous genes from *Paenisporosarcina* sp. TG-14 and *Virgibacillus* sp. CM-4, respectively. Conserved residues are indicated by asterisks. Arg572 in Lin1840 is indicated by an asterisk in inverted monochrome. (TIF)

**S2 Fig. Comparison of Lin1840r and JMB19063.** Domains 1, 2, and 3 of Lin1840r are presented in cyan, orange, and magenta, respectively. The corresponding domains of JMB19063 (PDB code, 3U48) are in light brown, blue, and brown, respectively. The linker region of

Lin1840r (amino acids 340–359) is shown in *black*. The loop region (amino acids 543–604) in Lin1840r and the corresponding loop in JMB19063 are labeled and shown in *red* and *green*, respectively.  $Mg^{2+}$  and  $Ca^{2+}$ , and water are shown as *green*, *red*, and *light blue* spheres, respectively. (A–B) Superpositioning of the dimers of both Lin1840r and JMB19063. (A) Both subunits B are presented in semitransparent. (B) Left monomers rotated by  $90^\circ$  in the direction of the Y-axis. The N-terminal and C-terminal regions of both subunits are denoted by N and C, respectively. (C) Metal ion binding sites of Lin1840r. Residues involved in binding of metal ions are labeled and represented as sticks. Residues forming inter-subunit hydrogen bonds are shown as sticks. Hydrogen bonds are depicted as *blue dotted* lines.  $F_o - F_c$  electron density maps of metal ions and coordinating atoms are shown as a *gray* mesh (contoured at  $3.0\sigma$ ). (TIF)

**S3 Fig. Superimpositioning of subsites –1 of GH3 BGLs.** All residues and ligands are shown as sticks. Lin1840r, JMB19063 (PDB ID, 3U48), *HvExoI* (PDB ID, 1IEQ), and *KmBglI* (PDB ID, 3AC0) are colored *cyan*, *green*, *orange*, and *magenta*, respectively. Glc molecules in JMB19063, *HvExoI*, and *KmBglI* are shown in *blue*, *pink*, and *olive*, respectively. The amino acid residues in Lin1840r are labeled. (TIF)

**S4 Fig. Complex structures of D270A with Sop<sub>3</sub> (A), Cel<sub>2</sub> (B), and Gen<sub>2</sub> (C).** Residues constituting subsites are shown as sticks. The  $F_o - F_c$  electron density maps of the ligands are represented as a *gray* mesh (contoured at  $3.0\sigma$ ). Glc molecules were omitted for calculation of the  $F_o - F_c$  maps. The color usage is as in Fig 2. Glc molecules are fitted to electron densities and shown in *green* stick. Glc moieties of the ligands are positioned at subsite +1 (A), subsite –1 and +1, and vicinity of Trp409 (B), and subsite –1 and +1 (C), respectively. (B, C) Regions derived from molecule A and B are shown in *cyan* and *yellow*, respectively. (TIF)

**S1 Table. Data collection and refinement statistics.**  
(TIF)

**S2 Table. Comparison of overall structures of Lin1840r and two other GH3 enzymes.**  
(TIF)

**S3 Table. Distances between Arg572 and ligands in D270A-Sop<sub>2</sub> and -Lam<sub>2</sub> complexes.**  
(TIF)

## Acknowledgments

This work was performed with the approval of the Photon Factory Program Advisory Committee (Proposal Nos. 2012G108 and 2014G509).

## Author Contributions

Conceived and designed the experiments: MN H. Taguchi. Performed the experiments: MN RY KA YT NS H. Toyozumi. Analyzed the data: MN RY AM H. Taguchi. Contributed reagents/materials/analysis tools: MN H. Taguchi. Wrote the paper: MN RY AM HN MK H. Taguchi.

## References

1. Hisamatsu M (1992) Cyclic (1→2)- $\beta$ -D-glucans (cyclophorans) produced by *Agrobacterium* and *Rhizobium* species. *Carbohydr Res.* 231: 137–146. PMID: [1394310](#)

2. Breedveld MW, Miller KJ (1994) Cyclic  $\beta$ -glucans of members of the family *Rhizobiaceae*. *Microbiol Rev* 58: 145–161. PMID: [8078434](#)
3. Hisamatsu M, Amemura A, Matsuo T, Matsuda H, Harada T (1982) Cyclic (1 $\rightarrow$ 2)- $\beta$ -D-glucan and the octasaccharide repeating-unit of succinoglycan produced by *Agrobacterium*. *J Gen Microbiol* 128: 1873–1879.
4. Briones G, Iñón de Iannino N, Roset M, Vigliocco A, Paulo PS, Ugalde RA (2001) *Brucella abortus* cyclic  $\beta$ -1,2-glucan mutants have reduced virulence in mice and are defective in intracellular replication in HeLa cells. *Infect Immun* 69: 4528–4535. PMID: [11401996](#)
5. Gay-Fraret J, Ardisson S, Kambara K, Broughton WJ, Deakin WJ, Le Quéré A (2012) Cyclic- $\beta$ -glucans of *Rhizobium* (*Sinorhizobium*) sp. strain NGR234 are required for hypo-osmotic adaptation, motility, and efficient symbiosis with host plants. *FEMS Microbiol Lett* 333: 28–36. doi: [10.1111/j.1574-6968.2012.02595.x](#) PMID: [22583376](#)
6. Rigano LA, Payette C, Brouillard G, Marano MR, Abramowicz L, Torres PS, et al. (2007) Bacterial cyclic  $\beta$ -(1,2)-glucan acts in systemic suppression of plant immune responses. *Plant Cell* 19: 2077–2089. PMID: [17601826](#)
7. Arellano-Reynoso B, Lapaque N, Salcedo S, Briones G, Ciocchini AE, Ugalde R, et al. (2005) Cyclic  $\beta$ -1,2-glucan is a *Brucella* virulence factor required for intracellular survival. *Nat Immunol* 6: 618–625. PMID: [15880113](#)
8. Bohin JP (2000) Osmoregulated periplasmic glucans in Proteobacteria. *FEMS Microbiol Lett* 186: 11–19. PMID: [10779706](#)
9. Talaga P, Fournet B, Bohin JP (1994) Periplasmic glucans of *Pseudomonas syringae* pv. *syringae*. *J Bacteriol* 176: 6538–6544. PMID: [7961404](#)
10. Miller KJ, Kennedy EP, Reinhold VN (1986) Osmotic adaptation by gram-negative bacteria: possible role for periplasmic oligosaccharides. *Science* 231: 48–51. PMID: [3941890](#)
11. Schmidt S, Zietz M, Schreiner M, Rohn S, Kroh LW, Krumbein A (2010) Identification of complex, naturally occurring flavonoid glycosides in kale (*Brassica oleracea* var. *sabellica*) by high-performance liquid chromatography diode-array detection/electrospray ionization multi-stage mass spectrometry. *Rapid Commun Mass Spectrom* 24: 2009–2022. doi: [10.1002/rcm.4605](#) PMID: [20552580](#)
12. Kitahara S, Edogawa S (1987) Cyclic (1 $\rightarrow$ 2)- $\beta$ -D-glucan-hydrolyzing enzymes from *Acremonium* sp. 15; purification and some properties of endo-(1 $\rightarrow$ 2)- $\beta$ -D-glucanase and  $\beta$ -D-glucosidase. *Agric Biol Chem* 51: 2701–2708.
13. Mendoza NS, Amemura A (1983) (1,2)- $\beta$ -D-Glucan-hydrolyzing enzymes in *Cytophaga arvensicola*: partial purification and some properties of endo-(1,2)- $\beta$ -glucanase and  $\beta$ -D-glucosidase specific for (1,2)- and (1,3)-linkages. *J Ferment Technol* 61: 473–481.
14. Nakajima M, Toyozumi H, Abe K, Nakai H, Taguchi H, Kitaoka M (2014) 1,2- $\beta$ -Oligoglucan phosphorylase from *Listeria innocua*. *PLoS One* 9: e92353. doi: [10.1371/journal.pone.0092353](#) PMID: [24647662](#)
15. Buchrieser C, Rusniok C, Kunst F, Cossart P, Glaser P, Consortium L (2003) Comparison of the genome sequences of *Listeria monocytogenes* and *Listeria innocua*: clues for evolution and pathogenicity. *FEMS Immunol Med Microbiol* 35: 207–213. PMID: [12648839](#)
16. Cantarel BL, Coutinho PM, Rancurel C, Bernard T, Lombard V, Henrissat B (2009) The Carbohydrate-Active EnZymes database (CAZy): an expert resource for glycogenomics. *Nucleic Acids Res* 37: D233–238. doi: [10.1093/nar/gkn663](#) PMID: [18838391](#)
17. Nakajima M, Yamashita T, Takahashi M, Nakano Y, Takeda T (2012) Identification, cloning, and characterization of  $\beta$ -glucosidase from *Ustilago esculenta*. *Appl Microbiol Biotechnol* 93: 1989–1998. doi: [10.1007/s00253-011-3538-2](#) PMID: [21850431](#)
18. McAndrew RP, Park JI, Heins RA, Reindl W, Friedland GD, D'haeseleer P, et al. (2013) From soil to structure, a novel dimeric  $\beta$ -glucosidase belonging to glycoside hydrolase family 3 isolated from compost using metagenomic analysis. *J Biol Chem* 288: 14985–14992. doi: [10.1074/jbc.M113.458356](#) PMID: [23580647](#)
19. Li YK, Chu SH, Sung YH (1998) Purification, characterization and mechanistic study of  $\beta$ -glucosidase from *Flavobacterium meningosepticum* (ATCC 13253). *J Chin Chem Soc* 45: 603–610.
20. Nakajima M, Yoshida R, Miyanaga A, Taguchi H (2014) Crystallization and preliminary X-ray diffraction analysis of Lin1840, a putative  $\beta$ -glucosidase from *Listeria innocua*. *Acta Crystallogr F Struct Biol Commun* 70: 1398–1401. doi: [10.1107/S2053230X14018597](#) PMID: [25286948](#)
21. Pace CN, Vajdos F, Fee L, Grimsley G, Gray T (1995) How to measure and predict the molar absorption coefficient of a protein. *Prot Sci* 4: 2411–2423.
22. Abe K, Nakajima M, Kitaoka M, Toyozumi H, Takahashi Y, Sugimoto N, et al. (2015) Large-scale preparation of 1,2- $\beta$ -glucan using 1,2- $\beta$ -oligoglucan phosphorylase. *J Appl Glycosci* 62: 47–52.

23. Battye TG, Kontogiannis L, Johnson O, Powell HR, Leslie AG (2011) iMOSFLM: a new graphical interface for diffraction-image processing with MOSFLM. *Acta Crystallogr D Biol Crystallogr* 67: 271–281. doi: [10.1107/S0907444910048675](https://doi.org/10.1107/S0907444910048675) PMID: [21460445](https://pubmed.ncbi.nlm.nih.gov/21460445/)
24. Arnold K, Bordoli L, Kopp J, Schwede T (2006) The SWISS-MODEL workspace: a web-based environment for protein structure homology modelling. *Bioinformatics* 22: 195–201. PMID: [16301204](https://pubmed.ncbi.nlm.nih.gov/16301204/)
25. Collaborative Computational Project—Number 4 (1994) The CCP4 suite: programs for protein crystallography. *Acta Crystallogr D Biol Crystallogr* 50: 760–763. PMID: [15299374](https://pubmed.ncbi.nlm.nih.gov/15299374/)
26. Morris RJ, Perrakis A, Lamzin VS (2002) ARP/wARP's model-building algorithms. I. The main chain. *Acta Crystallogr D Biol Crystallogr* 58: 968–975. PMID: [12037299](https://pubmed.ncbi.nlm.nih.gov/12037299/)
27. Emsley P, Cowtan K (2004) Coot: model-building tools for molecular graphics. *Acta Crystallogr D Biol Crystallogr* 60: 2126–2132. PMID: [15572765](https://pubmed.ncbi.nlm.nih.gov/15572765/)
28. Murshudov GN, Vagin AA, Dodson EJ (1997) Refinement of macromolecular structures by the maximum-likelihood method. *Acta Crystallogr D Biol Crystallogr* 53: 240–255. PMID: [15299926](https://pubmed.ncbi.nlm.nih.gov/15299926/)
29. Krissinel E, Henrick K (2007) Inference of macromolecular assemblies from crystalline state. *J Mol Biol* 372: 774–797. PMID: [17681537](https://pubmed.ncbi.nlm.nih.gov/17681537/)
30. Petersen TN, Brunak S, von Heijne G, Nielsen H (2011) SignalP 4.0: discriminating signal peptides from transmembrane regions. *Nat Methods* 8: 785–786. doi: [10.1038/nmeth.1701](https://doi.org/10.1038/nmeth.1701) PMID: [21959131](https://pubmed.ncbi.nlm.nih.gov/21959131/)
31. Chir J, Withers S, Wan CF, Li YK (2002) Identification of the two essential groups in the family 3  $\beta$ -glucosidase from *Flavobacterium meningosepticum* by labelling and tandem mass spectrometric analysis. *Biochem J* 365: 857–863. PMID: [11978178](https://pubmed.ncbi.nlm.nih.gov/11978178/)
32. Li YK, Chir J, Tanaka S, Chen FY (2002) Identification of the general acid/base catalyst of a family 3  $\beta$ -glucosidase from *Flavobacterium meningosepticum*. *Biochemistry* 41: 2751–2759. PMID: [11851422](https://pubmed.ncbi.nlm.nih.gov/11851422/)
33. Suzuki K, Sumitani J, Nam YW, Nishimaki T, Tani S, Wakagi T, et al. (2013) Crystal structures of glycoside hydrolase family 3  $\beta$ -glucosidase 1 from *Aspergillus aculeatus*. *Biochem J* 452: 211–221. doi: [10.1042/BJ20130054](https://doi.org/10.1042/BJ20130054) PMID: [23537284](https://pubmed.ncbi.nlm.nih.gov/23537284/)
34. Holm L, Rosenström P (2010) Dali server: conservation mapping in 3D. *Nucleic Acids Res* 38: W545–549. doi: [10.1093/nar/gkq366](https://doi.org/10.1093/nar/gkq366) PMID: [20457744](https://pubmed.ncbi.nlm.nih.gov/20457744/)
35. Varghese JN, Hrmova M, Fincher GB (1999) Three-dimensional structure of a barley  $\beta$ -D-glucan exohydrolase, a family 3 glycosyl hydrolase. *Structure* 7: 179–190. PMID: [10368285](https://pubmed.ncbi.nlm.nih.gov/10368285/)
36. Finn RD, Bateman A, Clements J, Coggill P, Eberhardt RY, Eddy SR, et al. (2014) Pfam: the protein families database. *Nucleic Acids Res* 42: D222–230. doi: [10.1093/nar/gkt1223](https://doi.org/10.1093/nar/gkt1223) PMID: [24288371](https://pubmed.ncbi.nlm.nih.gov/24288371/)
37. Zheng H, Chordia MD, Cooper DR, Chruszcz M, Müller P, Sheldrick GM, et al. (2014) Validation of metal-binding sites in macromolecular structures with the CheckMyMetal web server. *Nat Protoc* 9: 156–170. doi: [10.1038/nprot.2013.172](https://doi.org/10.1038/nprot.2013.172) PMID: [24356774](https://pubmed.ncbi.nlm.nih.gov/24356774/)
38. Cremer D, Pople JA (1975) A general definition of ring puckering coordinates. *J Am Chem Soc* 97: 1354–1358.
39. Hrmova M, Varghese JN, De Gori R, Smith BJ, Driguez H, Fincher GB (2001) Catalytic mechanisms and reaction intermediates along the hydrolytic pathway of a plant  $\beta$ -D-glucan glucohydrolase. *Structure* 9: 1005–1016. PMID: [11709165](https://pubmed.ncbi.nlm.nih.gov/11709165/)
40. Hrmova M, De Gori R, Smith BJ, Vasella A, Varghese JN, Fincher GB (2004) Three-dimensional structure of the barley  $\beta$ -D-glucan glucohydrolase in complex with a transition state mimic. *J Biol Chem* 279: 4970–4980. PMID: [14597633](https://pubmed.ncbi.nlm.nih.gov/14597633/)
41. Davies GJ, Mackenzie L, Varrot A, Dauter M, Brzozowski AM, Schülein M, et al. (1998) Snapshots along an enzymatic reaction coordinate: analysis of a retaining beta-glycoside hydrolase. *Biochemistry* 37: 11707–13. PMID: [9718293](https://pubmed.ncbi.nlm.nih.gov/9718293/)
42. Bacik JP, Whitworth GE, Stubbs KA, Vocadlo DJ, Mark BL (2012) Active site plasticity within the glycoside hydrolase NagZ underlies a dynamic mechanism of substrate distortion. *Chem Biol* 19: 1471–1482. doi: [10.1016/j.chembiol.2012.09.016](https://doi.org/10.1016/j.chembiol.2012.09.016) PMID: [23177201](https://pubmed.ncbi.nlm.nih.gov/23177201/)
43. Vasella A, Davies GJ, Böhm M (2002) Glycosidase mechanisms. *Curr Opin Chem Biol* 6: 619–629. PMID: [12413546](https://pubmed.ncbi.nlm.nih.gov/12413546/)
44. Hovel K, Shallom D, Niefind K, Belakhov V, Shoham G, Baasov T, et al. (2003) Crystal structure and snapshots along the reaction pathway of a family 51  $\alpha$ -L-arabinofuranosidase. *EMBO J* 22: 4922–4932. PMID: [14517232](https://pubmed.ncbi.nlm.nih.gov/14517232/)
45. Yoshida E, Hidaka M, Fushinobu S, Koyanagi T, Minami H, Tamaki H, et al. (2010) Role of a PA14 domain in determining substrate specificity of a glycoside hydrolase family 3  $\beta$ -glucosidase from *Kluyveromyces marxianus*. *Biochem J* 431: 39–49. doi: [10.1042/BJ20100351](https://doi.org/10.1042/BJ20100351) PMID: [20662765](https://pubmed.ncbi.nlm.nih.gov/20662765/)



46. Karkehabadi S, Helmich KE, Kaper T, Hansson H, Mikkelsen NE, Gudmundsson M, et al. (2014) Biochemical characterization and crystal structures of a fungal family 3  $\beta$ -glucosidase, Cel3A from *Hypocrea jecorina*. *J Biol Chem* 289: 31624–31637. doi: [10.1074/jbc.M114.587766](https://doi.org/10.1074/jbc.M114.587766) PMID: [25164811](https://pubmed.ncbi.nlm.nih.gov/25164811/)
47. Pozzo T, Pasten JL, Karlsson EN, Logan DT (2010) Structural and functional analyses of  $\beta$ -glucosidase 3B from *Thermotoga neapolitana*: a thermostable three-domain representative of glycoside hydrolase 3. *J Mol Biol* 397: 724–739. doi: [10.1016/j.jmb.2010.01.072](https://doi.org/10.1016/j.jmb.2010.01.072) PMID: [20138890](https://pubmed.ncbi.nlm.nih.gov/20138890/)
48. Hrmova M, De Gori R, Smith BJ, Fairweather JK, Driguez H, Varghese JN, et al. (2002) Structural basis for broad substrate specificity in higher plant  $\beta$ -D-glucan glucohydrolases. *Plant Cell* 14: 1033–1052. PMID: [12034895](https://pubmed.ncbi.nlm.nih.gov/12034895/)
49. Stortz CA, Cerezo AS (2003) MM3 potential energy surfaces of the 2-linked glucosyl trisaccharides  $\alpha$ -kojitriose and  $\beta$ -sophorotriose. *Carbohydr Res* 338: 1679–1689. PMID: [12873423](https://pubmed.ncbi.nlm.nih.gov/12873423/)
50. Baba Y, Sumitani JI, Tani S, Kawaguchi T (2015) Characterization of *Aspergillus aculeatus*  $\beta$ -glucosidase 1 accelerating cellulose hydrolysis with *Trichoderma* cellulase system. *AMB Express* 5: 3. PMID: [25642400](https://pubmed.ncbi.nlm.nih.gov/25642400/)
51. Di Tommaso P, Moretti S, Xenarios I, Orobittg M, Montanyola A, Chang JM, et al. (2007) T-Coffee: a web server for the multiple sequence alignment of protein and RNA sequences using structural information and homology extension. *Nucleic Acids Res* 39: W13–17.
